# Supplementary material
Source: PubMed Central journal article supplement (PMC3964060)
Supplement: 1320001111_pnas.201320001SI.pdf [file 1320001111_pnas.201320001SI.pdf]

# Supporting Information

Reker et al. 10.1073/pnas.1320001111

## SI Materials and Methods

All starting materials and solvents were purchased from Sigma-Aldrich, Fluka, or ABCR and were used without further purification.

Microwave syntheses were performed on a Biotage Initiator microwave synthesizer.

Melting points (mp) were recorded on a Büchi M560 apparatus and are uncorrected. Proton and carbon NMR ( $^1\text{H}$  and  $^{13}\text{C}$  NMR) spectra were recorded on a Bruker Avance 400 (400 and 100 MHz, respectively). All chemical shifts are quoted on the  $\delta$  scale in parts per million using residual solvent peaks as the internal standard. Coupling constants ( $J$ ) are reported in hertz with the following splitting abbreviations: s, singlet; d, doublet; dd, doublet of doublets; td, triplet of doublets; m, multiplet.

Analytical HPLC-MS was carried out in a Shimadzu LC-MS2020 system, equipped with a Nucleodur C<sub>18</sub> HTec column, under an appropriate gradient of acetonitrile: H<sub>2</sub>O (+0.1% formic acid in each solvent), and a total flow rate of 0.5 mL/min. Preparative HPLC was carried out on a Shimadzu LC-8A system, coupled to a Nucleodur 100–5 C<sub>18</sub> HTec column, and a SPD-20A UV/Vis detector. High-resolution MS (HRMS) analyses were performed on a Bruker Daltonics maXis electrospray ionization (ESI) quadrupole time-of-flight device. MS analyses were operated in positive-ion mode with ESI. Nominal and exact  $m/z$  values are reported in daltons. All compounds present purity  $\geq 95\%$  based on LC-MS analysis.

**Docking.** Docking was performed using GOLD (version 5.2) with HIV1 protease cocrystallized with the de novo design template amprenavir [Protein Data Bank (PDB) code 1HPV]. The binding site was defined by the position of amprenavir. **1** and **2** were preprocessed using the Molecular Operating Environment (MOE; Chemical Computing Group, Montreal) wash function, and starting structures were calculated using the MOE energy minimizer. Hydrogen atoms were added to the protein, and waters were deleted using internal GOLD functions. Atom typing for ligand and protein was activated, and conformations were scored using the ChemPLP scoring function.

**Repurposing.** The publicly available target prediction methods Similarity Ensemble Approach (SEA; <http://sea.bkslab.org/>; version ChEMBL 10), Prediction of Activity Spectra (PASS; [www.pharmaexpert.ru/passonline/](http://www.pharmaexpert.ru/passonline/)), Semantic Link Association Prediction (SLAP; <http://cheminfv.informatics.indiana.edu:8080/slap/>), and the method SuperPRED (<http://bioinformatics.charite.de/superpred/>) were applied using their freely available online services. Compounds **1** and **2** and the design template amprenavir were provided as simplified molecular input line entry system (SMILES). Results were manually extracted and sorted according to provided confidence scores (scores or  $P$  values). For the PASS method, which provides two orthogonal confidence scores,  $P(\text{active})$  and  $P(\text{inactive})$ , the ratio of these scores  $P(\text{active})/P(\text{inactive})$  was used.

## Library of Pharmacologically Active Compounds Off-Target Prediction.

The library of pharmacologically active compound (LOPAC) collection (version 1280) was downloaded ([www.sigmaldrich.com](http://www.sigmaldrich.com)) and preprocessed as described in the main text. Previously pre-computed self-organizing maps (SOMs) clustering the whole collection of bioactive reference analogs (COBRA, inSili.com LLC, Zurich) were used to project queries onto clusters of reference compounds. Tanimoto similarities ( $T_c$ ) of every query were computed from Daylight fingerprints of coclustered drugs. When a prediction for a particular target used at least one reference with a  $T_c > 0.2$ , the prediction was discarded. This procedure left us with a list of predictions using structurally unrelated references. Filtering for high-confidence predictions ( $P < 0.001$ ) left us with the final set of predictions.

**Screening Assays.** Activity tests were performed by contractors on a fee-for-service basis. EC<sub>50</sub> values against the B<sub>1</sub> receptor were determined by measuring intracellular calcium by fluorimetry in human recombinant CHO cells at Cerep (Ref. 1109) (1). The agonist effect on vanilloid 1 (TRPV1) was determined by measuring intracellular calcium by fluorimetry in human recombinant CHO cells at Cerep (Ref. 1640) (2). The antagonist effect on neurokinin 1 (NK1) was determined by measuring intracellular calcium by fluorimetry in U373 cells at Cerep (Ref. 2192) (3). Screening against proteases was carried out at Reaction Biology Corp. using suitable assay kits.

**Spectral Data for Compound 1.**  $^1\text{H}$  NMR (CD<sub>3</sub>OD, 400.13 MHz)  $\delta$  1.36 (9H, s, (CH<sub>3</sub>)<sub>3</sub>), 1.91–2.02 (2H, m, CH<sub>2</sub>), 2.43 (3H, s, CH<sub>3</sub>), 2.62 (1H, dd,  $J = 13.6$  and  $9.7$  Hz, CH<sub>2</sub>), 2.80 (1H, dd,  $J = 13.6$  and  $5.2$  Hz, CH<sub>2</sub>), 3.35–3.52 (4H, m, CH<sub>2</sub>), 3.74 (1H, d,  $J = 5.0$  Hz, CH), 3.94 (1H, m, CH), 5.03 (1H, m, CH), 6.50 (1H, d,  $J = 9.4$  Hz, NH), 7.16–7.27 (5H, m, Ar-H), 7.42 (2H, d,  $J = 8.0$  Hz, Ar-H), 7.73 (2H, d,  $J = 8.0$  Hz, Ar-H);  $^{13}\text{C}$  NMR (CD<sub>3</sub>OD, 100.61 MHz)  $\delta$  21.55; 28.74; 32.28; 37.00; 47.49; 54.55; 56.12; 73.86; 75.65; 80.23; 127.37; 128.79; 129.28; 130.55; 130.64; 131.02; 134.78; 139.48; 145.38; 173.53; HRMS-ESI calc. (C<sub>26</sub>H<sub>34</sub>N<sub>2</sub>O<sub>7</sub>S + Na<sup>+</sup>): 541.1979, found: 541.1976.

**Spectral Data for Compound 2.**  $^1\text{H}$  NMR (CD<sub>3</sub>OD, 400.13 MHz)  $\delta$  1.63–1.80 (2H, m, CH<sub>2</sub>), 2.32 (3H, s, CH<sub>3</sub>), 2.76 (1H, dd,  $J = 14.0$  and  $7.0$  Hz, CH<sub>2</sub>), 2.85 (1H, dd,  $J = 14.0$  and  $7.0$  Hz, CH<sub>2</sub>), 3.16 (2H, dd,  $J = 9.0$  and  $5.2$  Hz, CH<sub>2</sub>), 3.24 (2H, m, CH<sub>2</sub>), 3.73 (1H, td,  $J = 7.0$  and  $3.0$  Hz, CH), 4.17 (1H, d,  $J = 3.0$  Hz, CH), 4.74 (1H, m, CH), 7.11–7.26 (5H, m, Ar-H), 7.31 (2H, d,  $J = 8.2$  Hz, Ar-H), 7.60 (2H, d,  $J = 8.2$  Hz, Ar-H);  $^{13}\text{C}$  NMR (CD<sub>3</sub>OD, 100.61 MHz)  $\delta$  21.50, 32.06, 34.51, 47.20, 54.42, 56.07, 70.56, 76.37, 128.66, 128.77, 130.02, 130.73, 130.98, 134.71, 136.50, 145.50, 171.37; HRMS-ESI calc. (C<sub>21</sub>H<sub>26</sub>N<sub>2</sub>O<sub>5</sub>S + H<sup>+</sup>): 419.1635, found: 419.1634.

1. Simpson PB, Woollacott AJ, Hill RG, Seabrook GR (2000) Functional characterization of bradykinin analogues on recombinant human bradykinin B(1) and B(2) receptors. *Eur J Pharmacol* 392(1–2):1–9.
2. Phelps PT, Anthes JC, Correll CC (2005) Cloning and functional characterization of dog transient receptor potential vanilloid receptor-1 (TRPV1). *Eur J Pharmacol* 513(1–2):57–66.

3. Eistetter HR, et al. (1992) Functional characterization of neurokinin-1 receptors on human U373MG astrocytoma cells. *Glia* 6(2):89–95.

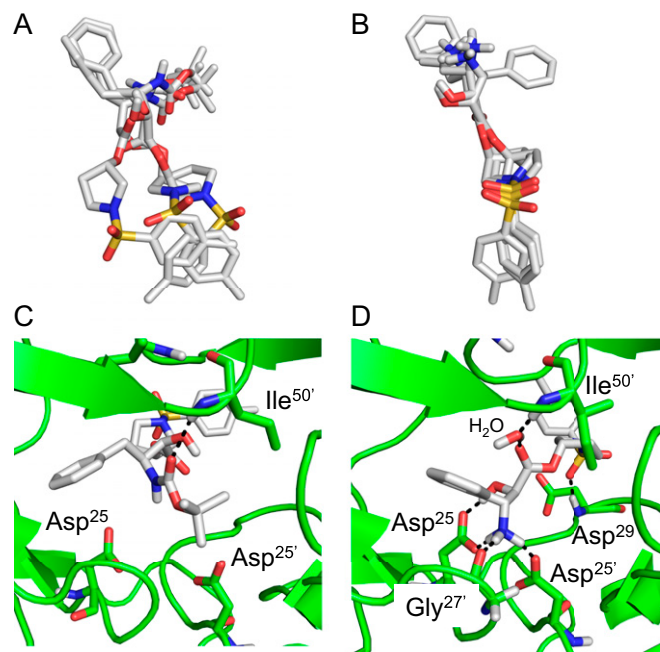

**Fig. S1.** Superimposition of the top three docking poses for **1** (A) and **2** (B). Docking poses of compounds **1** (C) and **2** (D) in the catalytic site of HIV-1 protease (PDB code 1HPV) (1). Hydrogen bonds with Asp<sup>25</sup> residues are highlighted. Images were generated with PyMOL v1.4.1 (Schrödinger), and for clarity, only polar hydrogen atoms are shown.

1. Kim EE, et al. (1995) Crystal structure of HIV-1 protease in complex with VX-478, a potent and orally bioavailable inhibitor of the enzyme. *J Am Chem Soc* 117(3):1181–1182.

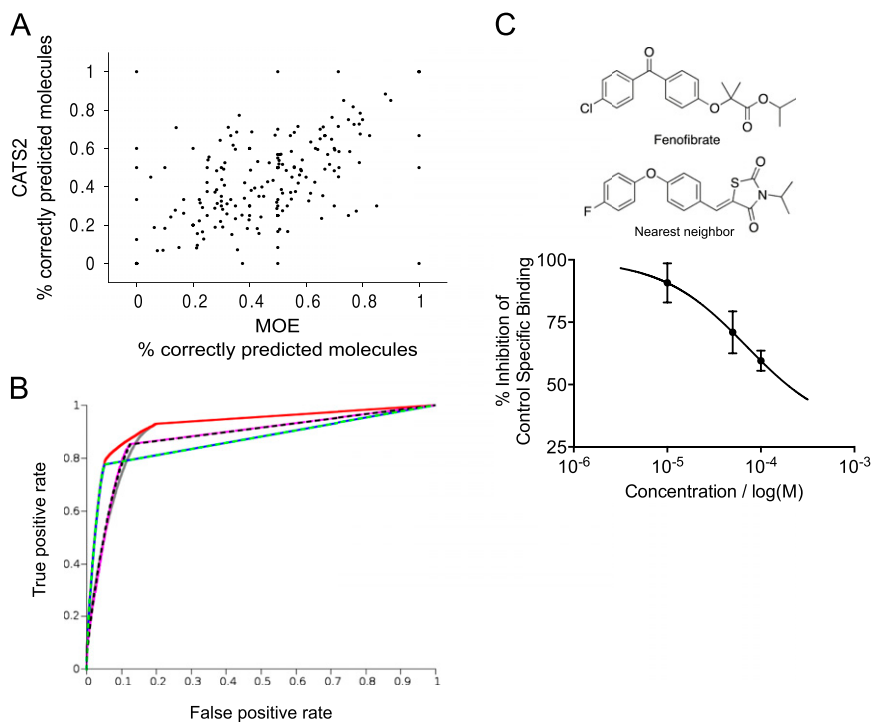

**Fig. S2.** (A) Performance of the prediction models using solely the chemically advanced template search (CATS) or the MOE representation, measured in percentage of molecules for which the correct target is predicted with significant confidence ( $P < 5\%$ ). Each point represents the performance on molecules associated with one particular target. (B) ROC curves for the different combination functions (arithmetic average, red; maximum, gray; minimum, blue; geometric average, dashed green; CATS2 only, pink; MOE only, dashed black). (C) Structures of fenofibrate and its nearest neighbor from the training data annotated to block sodium ion channels and the concentration-response curve of fenofibrate against Na<sub>v</sub>1.5 ion channels ( $n = 2$ , mean and SEM).



**Table S1. Top 10 SEA predictions for compounds 1 and 2 and the scores for elastase and the B<sub>1</sub> receptor, computed with default parameters (ChEMBL v10, ECFP4)**

| Target                                           | E value   | maxTC |
|--------------------------------------------------|-----------|-------|
| <b>Compound 1</b>                                |           |       |
| HIV type 1 protease                              | 3.65e-127 | 0.51  |
| BACE-1                                           | 1.47e-85  | 0.40  |
| Renin                                            | 3.05e-82  | 0.43  |
| Cathepsin D                                      | 7.11e-47  | 0.36  |
| Cathepsin D                                      | 2.05e-42  | 0.37  |
| Cholecystokinin A receptor                       | 2.01e-30  | 0.35  |
| Cholecystokinin B receptor                       | 3.44e-27  | 0.35  |
| Nicestrin                                        | 1.87e-26  | 0.39  |
| Presenilin 2, 1                                  | 1.87e-26  | 0.39  |
| Gamma-secretase subunit APH-1A                   | 4.42e-24  | 0.39  |
| Leukocyte elastase                               | 1.42e-2   | 0.35  |
| Bradykinin B <sub>1</sub> receptor               | 2.41e-1   | 0.32  |
| <b>Compound 2</b>                                |           |       |
| Oligopeptide transporter small intestine isoform | 4.39e-55  | 0.33  |
| HIV type 1 protease                              | 8.96e-31  | 0.37  |
| Angiotensin-converting enzyme                    | 1.51e-26  | 0.32  |
| Matrix metalloproteinase 7                       | 4.32e-18  | 0.36  |
| Angiotensin-converting enzyme                    | 6.66e-17  | 0.32  |
| Matrix metalloproteinase 3                       | 4.06e-16  | 0.36  |
| Nepilysin                                        | 7.40e-16  | 0.33  |
| Matrix metalloproteinase 13                      | 7.41e-16  | 0.36  |
| Matrix metalloproteinase-1                       | 1.73e-14  | 0.36  |
| Integrin alpha-4                                 | 9.86e-14  | 0.4   |
| BACE-1                                           | 1.17e-04  | 0.36  |
| Bradykinin B <sub>1</sub> receptor               | 6.10e+00  | 0.32  |

Overall, 104 targets were predicted for compound 1 and 75 targets for compound 2.

**Table S2. List of drug targets predicted for amprenavir by SLAP**

| Target                         | P value | Score |
|--------------------------------|---------|-------|
| BACE-1                         | 0.0001  | 876   |
| Renin                          | 0.0009  | 381   |
| ABC transporter C1             | 0.0026  | 232   |
| ABC transporter G2             | 0.0066  | 142   |
| Endothelin-converting enzyme 1 | 0.0068  | 139   |
| fMet-Leu-Phe receptor          | 0.0074  | 134   |
| Cyp 3A4                        | 0.0091  | 119   |

**Table S3. Top 10 PASS predictions for compounds 1 (of 142 predictions) and 2 (of 277 predictions) according to the ratio  $P(\text{active})/P(\text{inactive})$**

| Target                                  | $P(\text{active})$ | $P(\text{inactive})$ | $P(\text{active})/P(\text{inactive})$ |
|-----------------------------------------|--------------------|----------------------|---------------------------------------|
| <b>Compound 1</b>                       |                    |                      |                                       |
| Integrin $\alpha 2\beta 1$ antagonist   | 0.215              | 0.002                | 107.50                                |
| Integrin $\alpha 2$ antagonist          | 0.271              | 0.004                | 67.75                                 |
| Antiviral (HIV)                         | 0.271              | 0.012                | 22.58                                 |
| Centromere associated protein inhibitor | 0.491              | 0.032                | 15.34                                 |
| Chymotrypsin inhibitor                  | 0.183              | 0.012                | 15.25                                 |
| Secretase inhibitor                     | 0.111              | 0.008                | 13.88                                 |
| Antiviral                               | 0.338              | 0.025                | 13.52                                 |
| HIV-1 protease inhibitor                | 0.066              | 0.005                | 13.20                                 |
| Cell adhesion inhibitor                 | 0.18               | 0.015                | 12.00                                 |
| CYP2C19 inducer                         | 0.395              | 0.043                | 9.19                                  |
| <b>Compound 2</b>                       |                    |                      |                                       |
| Ompitin inhibitor                       | 0.745              | 0.014                | 53.21                                 |
| Integrin $\alpha 2$ antagonist          | 0.155              | 0.005                | 31.00                                 |
| Nardilysin inhibitor                    | 0.419              | 0.014                | 29.93                                 |
| PfA-M1 aminopeptidase inhibitor         | 0.432              | 0.018                | 24.00                                 |
| Tripeptide aminopeptidase inhibitor     | 0.366              | 0.016                | 22.88                                 |
| Glutamyl endopeptidase II inhibitor     | 0.674              | 0.033                | 20.42                                 |
| Integrin $\alpha 2\beta 1$ antagonist   | 0.104              | 0.007                | 14.86                                 |
| Lactase inhibitor                       | 0.462              | 0.037                | 12.49                                 |
| Viral entry inhibitor                   | 0.263              | 0.022                | 11.95                                 |
| Phosphatase inhibitor                   | 0.595              | 0.05                 | 11.90                                 |

**Table S4. Top 5 (of 14) SuperPred target predictions for compound 1 and the top 3 (of 15) SuperPred predictions for compound 2**

| Target            | Reference compound   | Score |
|-------------------|----------------------|-------|
| <b>Compound 1</b> |                      |       |
| HIV-1 protease    | Amprenavir           | 65.9  |
| HIV-1 protease    | AIDS-031900          | 64.1  |
| HIV-1 protease    | AIDS-073036          | 63.4  |
| No target found   | Fosamprenavir        | 59.6  |
| HIV-1 protease    | Fosamprenavir sodium | 59.3  |
| <b>Compound 2</b> |                      |       |
| HIV-1 protease    | Amprenavir           | 56.4  |
| HIV-1 protease    | AIDS-031900          | 54.8  |
| HIV-1 protease    | AIDS-073036          | 54.6  |

**Table S5. Cross-validation results for different combination functions of the SOM-based prediction of drug equivalence relationships (SPiDER) model: Percentage of molecules that had their complete target profile predicted with significant confidence, area under the ROC curve, and average number of significantly predicted compounds**

| Combination     | Percentage correctly predicted molecules | ROC AUC | Number of significant predictions |
|-----------------|------------------------------------------|---------|-----------------------------------|
| CATS-only       | 41.0 $\pm$ 0.7                           | 0.879   | 10.9                              |
| MOE-only        | 41.3 $\pm$ 0.5                           | 0.879   | 10.8                              |
| Minimum         | 65.2 $\pm$ 0.4                           | 0.868   | 10.9                              |
| Maximum         | 41.0 $\pm$ 0.6                           | 0.905   | 10.8                              |
| Arithmetic mean | 65.3 $\pm$ 0.4                           | 0.927   | 10.9                              |
| Geometric mean  | 65.3 $\pm$ 0.4                           | 0.868   | 10.9                              |
